# Supplementary material for: Changes in Suicide Reporting Quality and Deaths in Ontario Following Publication of National Media Guidelines
Source: Atypon-hosted journal article supplement (doi:10.1027/0227-5910/a000737), 2020-11-26
Supplement: 0227-5910_a000737_esm1.pdf [file 0227-5910_a000737_esm1.pdf]

**Suicide search string for Infomart database:**

suicide OR suicidal OR "killed himself" OR "killed herself" OR "kill himself" OR "kill herself" OR "hung himself" OR "hung herself" OR "took his life" OR "took her life" OR "take his life" OR "take her life" OR "end his own life" OR "end her own life" OR "ended his own life" OR "ended her own life" OR "end his life" OR "end her life" OR "ended his life" OR "ended her life" OR "ends his life" OR "ends her life"

Table E1. Characteristics and Quality of a Random Sample of Print and Online Articles Prior to and After the Release of Canadian Psychiatric Association Media Reporting Guidelines

|                                   | All articles<br>n=988 | Articles<br>published in<br>2002-2008<br>n=494 | Articles<br>published in<br>2009-2015<br>n=494 | $\chi^2$ |
|-----------------------------------|-----------------------|------------------------------------------------|------------------------------------------------|----------|
| <b>Media Item Characteristics</b> | Count (%)             | Count (%)                                      | Count (%)                                      |          |
| <b>Item Location</b>              |                       |                                                |                                                |          |
| Front page                        | 88 (8.9)              | 72 (14.6)                                      | 16 (3.2)                                       | 39.1***  |
| Online                            | 270 (27.3)            | 71 (14.4)                                      | 199(40.3)                                      | 83.5***  |
| <b>Age Focus</b>                  |                       |                                                |                                                |          |
| Youth                             | 244 (24.7)            | 110 (22.3)                                     | 134(27.1)                                      | 3.1      |
| Adult                             | 330 (33.4)            | 191 (38.7)                                     | 139 (28.1)                                     | 12.3***  |
| Older Adult                       | 52 (5.3)              | 25 (5.1)                                       | 27(5.5)                                        | 0.8      |
| <b>Sex Focus</b>                  |                       |                                                |                                                |          |
| Male                              | 616 (62.3)            | 349 (70.6)                                     | 267(54.0)                                      | 29.0***  |
| Female                            | 328 (33.2)            | 149 (30.2)                                     | 179 (36.2)                                     | 4.1*     |

**Suicide Focus**

|          |            |            |           |     |
|----------|------------|------------|-----------|-----|
| Ideation | 199 (20.1) | 92 (18.6)  | 107(21.7) | 1.4 |
| Attempt  | 198 (20.0) | 109 (22.1) | 89(18.0)  | 2.5 |
| Death    | 741 (75.0) | 377 (76.3) | 364(73.7) | .9  |

**Article Type**

|                                        |            |           |           |         |
|----------------------------------------|------------|-----------|-----------|---------|
| Specific person's<br>death/suicidality | 842 (85.2) | 454(91.9) | 388(78.5) | 35.0*** |
| Suicide research                       | 159 (16.1) | 62(12.6)  | 97(19.6)  | 9.2**   |
| Suicide public policy                  | 108 (10.9) | 29 (5.9)  | 79(16.0)  | 26.0*** |
| Assisted death                         | 140 (14.2) | 43 (8.7)  | 97(19.6)  | 24.3*** |
| Individual murder-suicide              | 135 (13.7) | 88 (17.8) | 47(9.5)   | 14.4*** |
| Mass murder-suicide                    | 17 (1.7)   | 7 (1.4)   | 10(2.0)   | .5      |
| Suicide pact                           | 17 (1.7)   | 8 (1.6)   | 9(1.8)    | .1      |
| Legal issues related to<br>suicide     | 238 (24.1) | 65 (13.2) | 173(35.0) | 64.6*** |

|                                   |            |          |          |        |
|-----------------------------------|------------|----------|----------|--------|
| Suicide as institutional protest‡ | 4 (0.4)    | 3 (0.6)  | 1(0.2)   |        |
| Opinion column                    | 108 (10.9) | 38 (7.7) | 70(14.2) | 10.7** |
| Advice column‡                    | 8 (0.8)    | 7 (1.4)  | 1(0.2)   |        |
| Suicide in fiction                | 64 (6.5)   | 36 (7.3) | 28(5.7)  | 1.1    |

---

‡Fisher's Exact Test

\*<0.05

\*\*<0.01

\*\*\*<0.001

Table E2. Characteristics and Quality of a Random Sample of Print and Online Articles Prior to and After the Release of the Mindset Guidelines

|                            |           | Articles<br>published in<br>Dec 28 2013 –<br>Mar 31, 2014 | Articles<br>published in<br>May 9 2014 –<br>Aug 10, 2014 | $\chi^2$ | df | p    |
|----------------------------|-----------|-----------------------------------------------------------|----------------------------------------------------------|----------|----|------|
|                            |           | n=421                                                     | n=325                                                    |          |    |      |
| Media Item Characteristics | Count (%) | Count (%)                                                 | Count (%)                                                |          |    |      |
| <b>Item Location</b>       |           |                                                           |                                                          |          |    |      |
| Front page                 | 45 (6.0)  | 17(4.0)                                                   | 28(8.6)                                                  | 6.78     | 1  | .009 |
| Online                     | 339(45.4) | 201(47.7)                                                 | 138(42.5)                                                | 2.06     | 1  | .151 |

| <b>Age Focus</b>                       |           |           |           |       |   |      |
|----------------------------------------|-----------|-----------|-----------|-------|---|------|
| Youth                                  | 195(26.1) | 116(27.6) | 79(24.3)  | 1.00  | 1 | .317 |
| Adult                                  | 263(35.3) | 161(38.2) | 102(31.4) | 3.78  | 1 | .052 |
| Elderly                                | 47(6.3)   | 24(5.7)   | 23(7.1)   | .588  | 1 | .443 |
| <b>Sex Focus</b>                       |           |           |           |       |   |      |
| Male                                   | 375(50.3) | 201(47.7) | 174(53.5) | 2.46  | 1 | .116 |
| Female                                 | 249(33.4) | 153(36.3) | 96(29.5)  | 3.82  | 1 | .051 |
| <b>Suicide Focus</b>                   |           |           |           |       |   |      |
| Ideation                               | 196(26.3) | 100(23.8) | 96(29.5)  | 3.17  | 1 | .075 |
| Attempt                                | 148(19.8) | 62(14.7)  | 86(26.5)  | 15.88 | 1 | .000 |
| Death                                  | 526(70.5) | 308(73.2) | 218(67.1) | 3.26  | 1 | .071 |
| <b>Article Type</b>                    |           |           |           |       |   |      |
| Specific person's<br>death/suicidality | 537(72.0) | 308(73.2) | 229(70.5) | .66   | 1 | .416 |
| Suicide research                       | 153(20.5) | 100(23.8) | 53(16.3)  | 6.24  | 1 | .013 |
| Suicide public policy                  | 131(17.6) | 84(20.0)  | 47(14.5)  | 3.82  | 1 | .051 |

|                                      |           |           |           |       |   |      |
|--------------------------------------|-----------|-----------|-----------|-------|---|------|
| Assisted death                       | 178(23.9) | 104(24.7) | 74(22.8)  | .378  | 1 | .539 |
| Individual murder-suicide            | 39(5.2)   | 12(2.9)   | 27(8.3)   | 11.03 | 1 | .001 |
| Mass murder-suicide                  | 18(2.4)   | 6(1.4)    | 12(3.7)   | 4.00  | 1 | .045 |
| Suicide pact                         | 21(2.8)   | 13(3.1)   | 8(2.5)    | .26   | 1 | .608 |
| Legal issues related to<br>suicide   | 338(45.3) | 168(39.9) | 170(52.3) | 11.39 | 1 | .001 |
| Suicide as institutional<br>protest‡ | 6(0.8)    | 2(0.5)    | 4(1.2)    |       |   | .412 |
| Opinion column                       | 132(17.7) | 61(14.5)  | 71(21.8)  | 6.82  | 1 | .009 |
| Advice column‡                       | 4(0.5)    | 0(0.0)    | 4(1.2)    |       |   | .036 |
| Suicide in fiction                   | 38(5.1)   | 16(3.8)   | 22(6.8)   | 3.34  | 1 | 0.67 |

---

‡Fisher's Exact Test

Table E3. Putatively Harmful and Protective Characteristics of a Random Sample of Print and Online

Articles Prior to and After the Release of the Mindset Guidelines

| Media Item characteristic      | Count (%) | Articles published in Dec 28 2013 – Mar 31, 2014 | Articles published in May 9 2014 – Aug 10, 2014 | $\chi^2$ | df | p    |
|--------------------------------|-----------|--------------------------------------------------|-------------------------------------------------|----------|----|------|
|                                |           | n=421                                            | n=325                                           |          |    |      |
| <b>Putatively Harmful</b>      |           |                                                  |                                                 |          |    |      |
| Word “suicide” in the headline | 227(30.4) | 145(34.4)                                        | 82(25.2)                                        | 7.35     | 1  | .007 |
| Suicide method (headline)      | 25(3.4)   | 17(4.0)                                          | 8(2.5)                                          | 1.41     | 1  | .235 |
| Suicide method (text)          | 317(42.5) | 186(44.2)                                        | 131(40.3)                                       | 1.126    | 1  | .289 |
| Hanging                        | 90(12.1)  | 49(11.6)                                         | 41(12.6)                                        | .17      | 1  | .685 |
| Self-poisoning                 | 75(10.1)  | 52(12.4)                                         | 23(7.1)                                         | 5.64     | 1  | .018 |
| Jumping (building)             | 30(4.0)   | 23(5.5)                                          | 7(2.2)                                          | 5.20     | 1  | .023 |
| Jumping (bridge)               | 21(2.8)   | 20(4.8)                                          | 1(0.3)                                          | 13.23    | 1  | .000 |
| Railway‡                       | 9(1.2)    | 7(1.7)                                           | 2(0.6)                                          |          |    | .312 |



|                                    |           |          |          |      |   |       |
|------------------------------------|-----------|----------|----------|------|---|-------|
| Asphyxia by car exhaust‡           | 2(0.3)    | 2(0.5)   | 0(0.0)   |      |   | .508  |
| Asphyxia other than by car exhaust | 22(2.9)   | 10(2.4)  | 12(3.7)  | 1.11 | 1 | .292  |
| Firearm                            | 47(6.3)   | 21(5.0)  | 26(8.0)  | 2.82 | 1 | .093  |
| Cutting/stabbing                   | 35(4.7)   | 15(3.6)  | 20(6.2)  | 2.75 | 1 | .097  |
| Drowning‡                          | 8(1.1)    | 5(1.2)   | 3(0.9)   |      |   | 1.000 |
| Burning/electrocution‡             | 7(0.9)    | 2(0.5)   | 5(1.5)   |      |   | .249  |
| “Suicide by cop”‡                  | 3(0.4)    | 0(0.0)   | 3(0.9)   |      |   | .082  |
| Euthanasia                         | 25(3.4)   | 12(2.9)  | 13(4.0)  | .75  | 1 | .387  |
| Other                              | 27(3.6)   | 17(4.0)  | 10(3.1)  | .486 | 1 | .486  |
| Method described in detail         | 94(12.6)  | 56(13.3) | 38(11.7) | .431 | 1 | .511  |
| Photo (deceased)                   | 165(22.1) | 97(23.0) | 68(20.9) | .477 | 1 | .490  |
| Photo (of someone looking sad)     | 42(5.6)   | 25(5.9)  | 17(5.2)  | .173 | 1 | .678  |

|                                          |           |           |          |       |   |      |
|------------------------------------------|-----------|-----------|----------|-------|---|------|
| Favorable characteristic<br>(deceased)†  | 83(11.1)  | 44(10.5)  | 39(12.0) |       |   |      |
| Identifies deceased as a<br>celebrity    | 71(9.5)   | 50(11.9)  | 21(6.5)  | 6.25  | 1 | .012 |
| Statement that suicide is<br>inevitable‡ | 9(1.2)    | 6(1.4)    | 3(0.9)   |       |   | .739 |
| Exciting reporting                       | 34(4.6)   | 14(3.3)   | 20(6.2)  | 3.37  | 1 | .066 |
| Glorified/romanticized<br>suicide‡       | 6(0.8)    | 2(0.5)    | 4(1.2)   |       |   | .412 |
| Monocausal explanation for<br>suicide    | 94(12.6)  | 44(10.5)  | 50(15.4) | 4.05  | 1 | .044 |
| Statement of approval of<br>suicide      | 21(2.8)   | 15(3.6)   | 6(1.8)   | 1.98  | 1 | .160 |
| Interview with the bereaved              | 153(20.5) | 104(24.7) | 49(15.1) | 10.43 | 1 | .001 |

**Putatively Protective**

|                                           |           |          |          |      |   |       |
|-------------------------------------------|-----------|----------|----------|------|---|-------|
| Unfavorable characteristic<br>(deceased)† | 17(2.3)   | 5(1.2)   | 12(3.7)  | 5.17 | 1 | .023  |
| Alternatives to suicide                   | 187(25.1) | 98(23.3) | 89(27.4) | 1.65 | 1 | .199  |
| Community resources                       | 17(2.3)   | 11(2.6)  | 6(1.8)   | .48  | 1 | .487  |
| Positive outcome of a<br>suicidal crisis‡ | 9(1.2)    | 5(1.2)   | 4(1.2)   |      |   | 1.000 |
| Warning signs of suicidal<br>behavior‡    | 5(0.7)    | 1(0.2)   | 4(1.2)   |      |   | .173  |
| How to approach someone‡                  | 0(0.0)    | 0(0.0)   | 0(0.0)   |      |   |       |
| Message of hope                           | 28(3.8)   | 21(5.0)  | 7(2.2)   | 4.08 | 1 | .043  |

† Favourable and unfavourable characteristics refer to statements in an article expressing positive or negative value judgments, respectively, about a person's character, personality or behavior

‡ Fisher's Exact Test

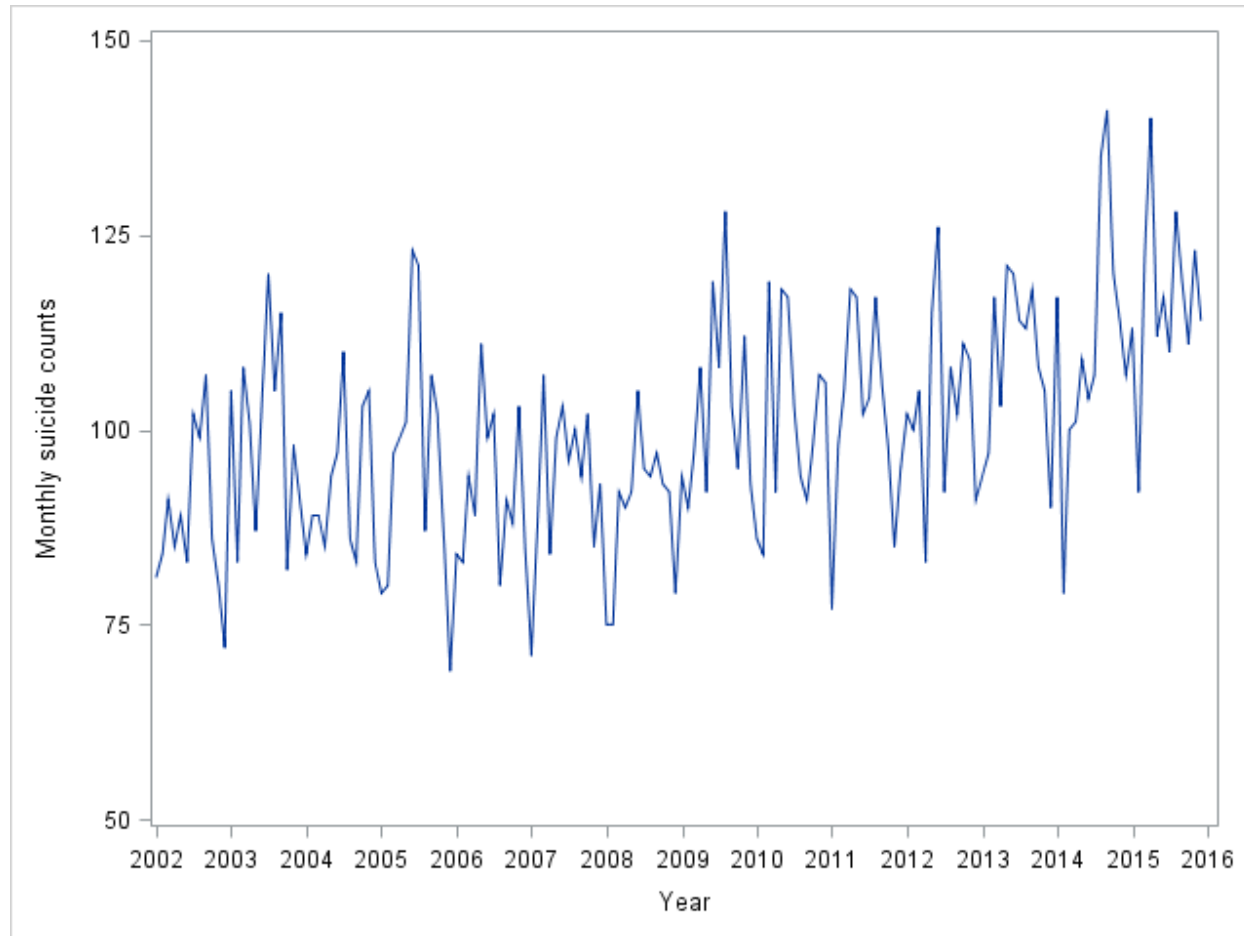

Figure E1. Monthly suicide count in Ontario 2002-2015
